# Supplementary material
Source: HighWire-hosted journal article supplement (https://gut.bmj.com/content/71/2/357)
Supplement: inline-supplementary-material-1 [file inline-supplementary-material-1.pdf]

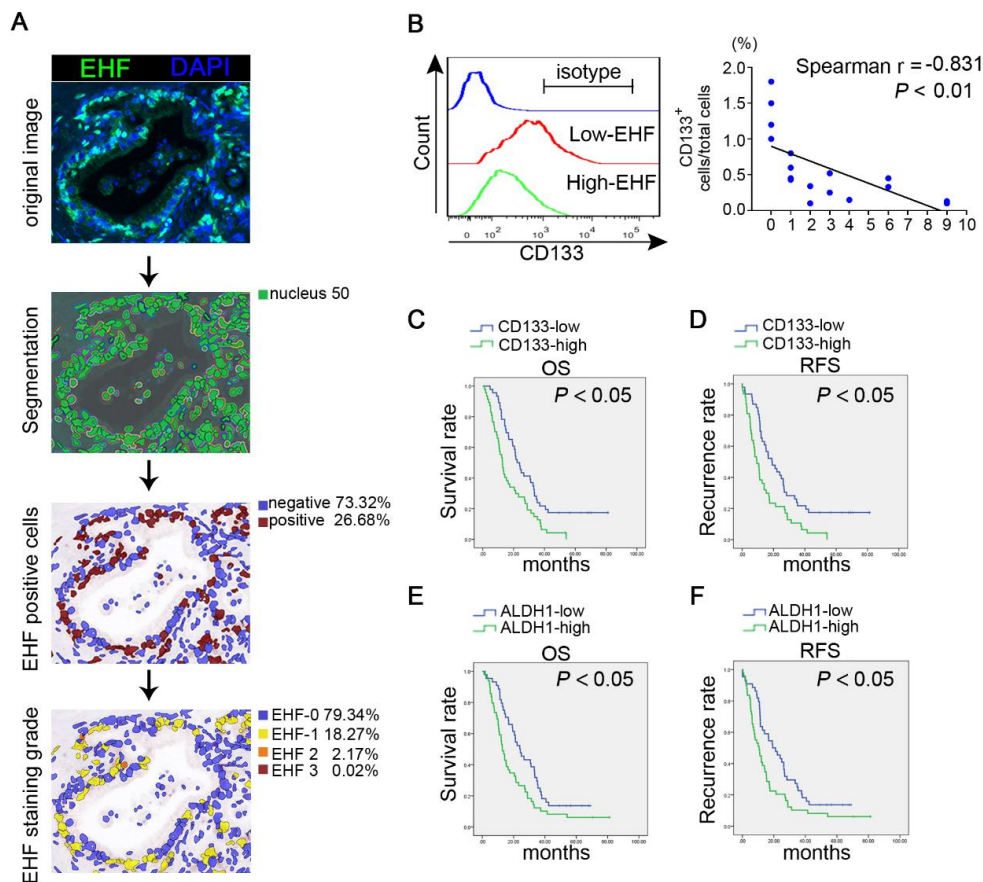

**Supplementary figure 1.** (A) The objective quantified method for EHF. Mean nucleus intensity of EHF, positive rate of EHF and EHF staining grade were quantified by PerkinElmer Advanced Image Analysis Software-in Form 2.4 Viewer. Tumor areas were manually outlined to exclude stromal nuclei. Nuclei, cytoplasm and membrane were segmented and DAPI was used to identify nuclei. (B) Single cell suspensions were prepared from 18 cases of fresh PDAC tissues and CD133<sup>+</sup> population were detected by flowcytometry. Anti-CD133 antibody (Miltenyi Biotec) was used. Representative histograms were shown (left) and Spearman correlation analysis between EHF IHC score and the proportions of CD133<sup>+</sup> cells (right);  $n=18$ ,  $P<0.01$ . (C-D) Prognostic significance of CD133<sup>+</sup> PCSCs for overall survival (C) and recurrence free survival (D) in a series of 93 cases of PDAC. Kaplan-Meier OS and RFS for different levels of CD133<sup>+</sup> PCSCs accumulation based on the log-rank statistic test. (E-F) Prognostic significance of ALDH1<sup>+</sup> PCSCs for overall survival (E) and recurrence free survival (F) in a series of 93 cases of PDAC. Kaplan-Meier OS and RFS for different levels of ALDH1<sup>+</sup> PCSCs accumulation based on the log-rank statistic test.
