# Supplementary material
Source: HighWire-hosted journal article supplement (https://gut.bmj.com/content/71/2/357)
Supplement: inline-supplementary-material-2 [file inline-supplementary-material-2.pdf]

**Supplementary table1: Correlation of ESE3/EHF expression to clinicopathological features in PDAC.**

| Parameters                |          | ESE3(n) |      | $\chi^2$ | <i>P</i>                 | <i>r</i> |
|---------------------------|----------|---------|------|----------|--------------------------|----------|
|                           |          | low     | high |          |                          |          |
| <b>Age(years)</b>         | <60      | 33      | 16   | 0.205    | 0.601                    | 0.042    |
|                           | ≥60      | 30      | 14   |          |                          |          |
| <b>Gender</b>             | Male     | 35      | 12   | 0.106    | 0.435                    | 0.032    |
|                           | Female   | 36      | 10   |          |                          |          |
| <b>Histological grade</b> | G1, G2   | 45      | 20   | 5.472    | <b>0.020<sup>a</sup></b> | -0.324   |
|                           | G3       | 25      | 3    |          |                          |          |
| <b>p TNM stage</b>        | IA, IB   | 33      | 19   | 3.276    | <b>0.031<sup>a</sup></b> | -0.137   |
|                           | IIA, IIB | 28      | 13   |          |                          |          |
| <b>Tumor size</b>         | T1≤3.5cm | 25      | 22   | 2.725    | 0.231                    | -0.456   |
|                           | T2>3.5cm | 30      | 16   |          |                          |          |
| <b>LN metastasis</b>      | N0       | 25      | 24   | 5.782    | 0.075                    | -0.443   |
|                           | N1       | 30      | 14   |          |                          |          |

Note: Data was based on IHC assay. Statistical data on EHF expression in relation to clinic-histopathologic features for surgical PDAC specimens. *P* values were calculated using the chi-square test. <sup>a</sup> Statistically significant (*P*<0.05). <sup>b</sup> Here EHF expression was divided into high-EHF and low-EHF according to staining scores.

**Supplementary table2: Univariate and multivariate Cox proportional hazards analysis of clinicopathological factors for median overall survival and relapse free survival.**

| Variables                    | Overall survival   |                          | Relapse free survival |                          |
|------------------------------|--------------------|--------------------------|-----------------------|--------------------------|
|                              | HR (95.0% CI)      | P                        | HR (95.0% CI)         | P                        |
| <b>Univariate analysis</b>   |                    |                          |                       |                          |
| Age                          | 0.989(0.631-1.550) | 0.962                    | 1.108(0.707-1.737)    | 0.655                    |
| Gender                       | 0.934(0.606-1.438) | 0.756                    | 1.008(0.654-1.552)    | 0.973                    |
| Differentiation              | 0.762(0.451-1.287) | <b>0.031<sup>a</sup></b> | 0.710(0.420-1.199)    | <b>0.020<sup>a</sup></b> |
| Tumor size                   | 1.582(1.007-2.487) | <b>0.046<sup>a</sup></b> | 1.589(1.011-2.507)    | <b>0.045<sup>a</sup></b> |
| p TNM stage                  | 2.493(1.602-3.891) | <b>0.000<sup>a</sup></b> | 2.439(1.550-3.830)    | <b>0.000<sup>a</sup></b> |
| LN metastasis                | 0.862(0.505-1.472) | 0.586                    | 0.781(0.457-1.335)    | 0.366                    |
| EHF expression               | 0.253(0.156-0.409) | <b>0.000<sup>a</sup></b> | 0.268(0.164-0.437)    | <b>0.002<sup>a</sup></b> |
| <b>Multivariate analysis</b> |                    |                          |                       |                          |
| Differentiation              | 0.571(0.332-0.982) | <b>0.043<sup>a</sup></b> | 0.581(0.551-1.579)    | <b>0.049<sup>a</sup></b> |
| p TNM stage                  | 1.886(1.094-3.251) | <b>0.022<sup>a</sup></b> | 2.099(1.209-3.645)    | <b>0.008<sup>a</sup></b> |
| EHF expression               | 0.274(0.161-0.495) | <b>0.000<sup>a</sup></b> | 0.303(0.180-0.509)    | <b>0.000<sup>a</sup></b> |

NOTE: Data was based on IHC assay. EHF staining score was determined by two independent pathologists who were blinded to the patients' clinical features and outcomes. Multivariate Cox proportional hazards analysis used backward selection model. Abbreviations: HR, hazard ratio; CI, confidence interval; LN, lymph node. <sup>a</sup> Statistically significant ( $P < 0.05$ ).

Supplementary table3: a list of drug library used for ESE3/EHF targeting screening

| list of drug library |                               |                            |                             |                       |                    |                              |                     |                             |                      |                     |
|----------------------|-------------------------------|----------------------------|-----------------------------|-----------------------|--------------------|------------------------------|---------------------|-----------------------------|----------------------|---------------------|
|                      | 1                             | 2                          | 3                           | 4                     | 5                  | 6                            | 7                   | 8                           | 9                    | 10                  |
| <b>A</b>             | Vonoprazan                    | Peritoinin                 | Tomivosertib                | Faropenem dioxate     | Flavopiridol       | Flavopiridol (Hydrochloride) | Senegacestat        | Mitoquinone (mesylate)      | Taranabant           | Delapazolid         |
| <b>B</b>             | Nevaninibe hydrochloride      | K-604 dihydrochloride      | Linaprazan                  | BFH772                | Odenacatib         | Cadazolid                    | Treprostiniil       | Paquimimod                  | AEE788               | Plerixafor          |
| <b>C</b>             | Dihydroxidine (hydrochloride) | Velparib (dihydrochloride) | <b>Allopurinol riboside</b> | <b>Gestrinone</b>     | <b>Ralfinamide</b> | <b>Rosiglitazone</b>         | <b>Zanubrutinib</b> | <b>Ibuprofen piconol</b>    | <b>AZD-5991</b>      | <b>Linrodostat</b>  |
| <b>D</b>             | Ilaprazole                    | Aticaprant                 | GSK2982772                  | Ziritaxestat          | EDO-S101           | Danusertib                   | Dasatinib           | Dasatinib (hydrochloride)   | BMS-986142           | Mirde-sap           |
| <b>E</b>             | Triflucicib hydrochloride     | Nitromide                  | Fosfomycin                  | Ganciclovir           | Doramectin         | Capreomycin                  | Nafitine            | Tegobuvir                   | Novobrocin           | Daclatasvir         |
| <b>F</b>             | Niclosamide                   | Ronidazole                 | Ciclopirox                  | Sulfamerazine         | Cloxacillin        | Ivermectin                   | Ceftazidime         | Moxidectin                  | Bekanamycin          | Dihydrostreptomycin |
| <b>G</b>             | Sertaconazole                 | Ciprofloxacin              | Micafungin                  | Sulfathiazole         | Vaganciclovir      | Cefdinir                     | Tohafate            | Tizoxanide                  | Radezolid            | Chlortetracycline   |
| <b>H</b>             | Valacyclovir                  | Abidol                     | Troconazole                 | Butoconazole          | Vancromycin        | Isoniazid                    | Atazanavir          | Mezocillin                  | Elvitegravir         | Pipemidic acid      |
| <b>I</b>             | Chloroxine                    | Azocilin                   | ABT-333                     | Tobramycin            | Ritonavir          | Oxfendazole                  | Nafcilin            | Cloquinoxol                 | Proflavine           | Cinoxacin           |
| <b>J</b>             | Pentamidine                   | Sulbactam                  | Doripenem                   | Atovaquone            | Be-sifloxacin      | <b>Zanamvir</b>              | <b>idoxuridine</b>  | <b>Butenafine</b>           | Ketoconazole         | Moxifloxacin        |
| <b>K</b>             | Methacycline                  | Lopinavir                  | Ethambutol                  | Rientine              | Norfloxacilin      | Anidulafungin                | Erythromycin        | Osetamvir                   | <b>Roxithromycin</b> | <b>Saquinavir</b>   |
| <b>L</b>             | Sulfanilamide                 | Artemisinin                | Oxacillin                   | Saquinavir            | <b>Letemovir</b>   | Levofloxacin                 | Cefpiramide         | BAY57-1293                  | GS-7340              | Dapivirine          |
| <b>M</b>             | Cidofovir                     | Fenbendazole               | Bifonazole                  | Sulfadoxine           | Boceprevir         | Furagin                      | HygromycinB         | Ceflitoren                  | Rimantadine          | Salinomycin         |
| <b>N</b>             | Eprinomectin                  | (S)-Tedizolid              | Darunavir                   | Succinylsulfathiazole | Bla-penem          | Ribostamycin                 | Cefamandole         | HIV-1 integrase inhibitor   | Abacavir             | Ceftazoxime         |
| <b>O</b>             | Cefetamet pivoxil             | Cephalothin                | Clofoctol                   | CDK9-IN-1             | Actinomycin D      | PSI-6130                     | Acyclovir           | Anprolimum                  | Cloziquine           | GS-7340             |
| <b>P</b>             | Clarithromycin                | Cefradine                  | Tolcofos-methyl             | Diniconazole          | Cefonidic          | Lumefantrine                 | Chloroxylenol       | Ceftriaxone                 | Permethrin           | tamoxifen           |
| <b>Q</b>             | Betulinaldehyde               | Kasugamycin                | Paromomycin                 | Tazobactam            | Vidarabine         | Penicillin                   | Valnemulin          | Amikacin                    | Itraconazole         | metformin           |
| <b>R</b>             | Mino-cycineR                  | Ribavirin/Rilpivrin        | Cefmetazole                 | Nifursiol             | AZATHIAMYCN        | Omidazole                    | Totrazunil          | Amantadine                  | Pyrazinamide         | Famciclovir         |
| <b>S</b>             | Demeclocycline                | Limomin                    | Neomycin                    | Retapamulin           | Naphthoquinone     | Cefsulodin                   | Hexetidine          | HIV-1 integrase inhibitor 2 | Omidazole            | Rufloxacin          |

**Supplementary table4: detailed information of two patients whose specimens were used for isolation of primary cancer cells.**

|                        | Patient1#               | Patient2#               |
|------------------------|-------------------------|-------------------------|
| Primary cell name      | PDX1#                   | PDX2#                   |
| Gender                 | male                    | female                  |
| age                    | 65                      | 64                      |
| Date of admission      | 2016-03-23              | 2016-11-09              |
| Date of operation      | 2016-04-06              | 2016-11-28              |
| Date of recurrence     | 2016-12-05              | 2017-09-02              |
| Date of death          | 2017-03-02              | 2017-12-05              |
| Surgical option        | pancreaticoduodenectomy | pancreaticoduodenectomy |
| Pathological diagnosis | PDAC                    | PDAC                    |
| Histologic grade       | G2                      | G2                      |
| Tumor size             | 3.0cm                   | 4.0cm                   |
| LN metastasis          | yes                     | yes                     |
| Vessel invasion        | yes                     | yes                     |
| Nerve invasion         | yes                     | yes                     |

**Supplementary table5: Genomic background of two primary cancer cells PDX1# and PDX2#.**

| Sample | Gene name | Spliced variant                                                                                                                                                                                 | Function          | Mutation type | AA change                                                                                                                                                                                                                                                                                                                                                                                                                                                                                                                                                                                                         |
|--------|-----------|-------------------------------------------------------------------------------------------------------------------------------------------------------------------------------------------------|-------------------|---------------|-------------------------------------------------------------------------------------------------------------------------------------------------------------------------------------------------------------------------------------------------------------------------------------------------------------------------------------------------------------------------------------------------------------------------------------------------------------------------------------------------------------------------------------------------------------------------------------------------------------------|
| PDX1#  | KRAS      | NM_004985,NM_03336<br>0                                                                                                                                                                         | exonic            | missense SNV  | KRAS:NM_004985:exon2:c.G35C:p.G12A,KRAS:NM_033360:exon2:c.G35C:p.G12A                                                                                                                                                                                                                                                                                                                                                                                                                                                                                                                                             |
|        | TP53      | NM_000546,NM_001126112,NM_001126113,NM_001126114,NM_001126115,NM_001126116,NM_001126117,NM_001126118,NM_001276695,NM_001276696,NM_001276697,NM_001276698,NM_001276699,NM_001276760,NM_001276761 | exonic            | missense SNV  | TP53:NM_001126115:exon3:c.G347A:p.R116Q,TP53:NM_001126116:exon3:c.G347A:p.R116Q,TP53:NM_001126117:exon3:c.G347A:p.R116Q,TP53:NM_001276697:exon3:c.G266A:p.R89Q,TP53:NM_001276698:exon3:c.G266A:p.R89Q,TP53:NM_001276699:exon3:c.G266A:p.R89Q,TP53:NM_001126118:exon6:c.G626A:p.R209Q,TP53:NM_000546:exon7:c.G743A:p.R248Q,TP53:NM_001126112:exon7:c.G743A:p.R248Q,TP53:NM_001126113:exon7:c.G743A:p.R248Q,TP53:NM_001126114:exon7:c.G743A:p.R248Q,TP53:NM_001276695:exon7:c.G626A:p.R209Q,TP53:NM_001276696:exon7:c.G626A:p.R209Q,TP53:NM_001276760:exon7:c.G626A:p.R209Q,TP53:NM_001276761:exon7:c.G626A:p.R209Q |
|        | SMAD4     | NM_005359                                                                                                                                                                                       | Intronic mutation |               |                                                                                                                                                                                                                                                                                                                                                                                                                                                                                                                                                                                                                   |
|        | P16       | No mutation was found                                                                                                                                                                           |                   |               |                                                                                                                                                                                                                                                                                                                                                                                                                                                                                                                                                                                                                   |
| PDX2#  | KRAS      | NM_004985,NM_03336<br>0                                                                                                                                                                         | exonic            | missense SNV  | KRAS:NM_004985:exon2:c.G35A:p.G12D,KRAS:NM_033360:exon2:c.G35A:p.G12D                                                                                                                                                                                                                                                                                                                                                                                                                                                                                                                                             |
|        | TP53      | NM_000546,NM_001126112,NM_001126115,NM_001126118,NM_001276697,NM_001276760,NM_001276761                                                                                                         | exonic            | missense SNV  | TP53:NM_001126115:exon6:c.G683C:p.G228A,TP53:NM_001276697:exon6:c.G602C:p.G201A,TP53:NM_001126118:exon9:c.G962C:p.G321A,TP53:NM_000546:exon10:c.G1079C:p.G360A,TP53:NM_001126112:exon10:c.G1079C:p.G360A,TP53:NM_001276760:exon10:c.G962C:p                                                                                                                                                                                                                                                                                                                                                                       |

|  |       |                                                                                                                                                                                                                                         |                   |          |                                                                                                                                                                                                                                                                                                                                                                                                                                                                                                                                                                                                                                                                                                        |
|--|-------|-----------------------------------------------------------------------------------------------------------------------------------------------------------------------------------------------------------------------------------------|-------------------|----------|--------------------------------------------------------------------------------------------------------------------------------------------------------------------------------------------------------------------------------------------------------------------------------------------------------------------------------------------------------------------------------------------------------------------------------------------------------------------------------------------------------------------------------------------------------------------------------------------------------------------------------------------------------------------------------------------------------|
|  |       |                                                                                                                                                                                                                                         |                   |          | .G321A,TP53:NM_001276761:<br>exon10:c.G962C:p.G321A                                                                                                                                                                                                                                                                                                                                                                                                                                                                                                                                                                                                                                                    |
|  | TP53  | NM_000546,NM_00112<br>6112,NM_001126113,N<br>M_001126114,NM_0011<br>26115,NM_001126116,<br>NM_001126117,NM_00<br>1126118,NM_00127669<br>5,NM_001276696,NM_<br>001276697,NM_001276<br>698,NM_001276699,N<br>M_001276760,NM_001<br>276761 | exonic            | stopgain | TP53:NM_001126115:exon2:c.<br>C241T:p.R81X,TP53:NM_0011<br>26116:exon2:c.C241T:p.R81X,T<br>P53:NM_001126117:exon2:c.C<br>241T:p.R81X,TP53:NM_001276<br>697:exon2:c.C160T:p.R54X,TP<br>53:NM_001276698:exon2:c.C1<br>60T:p.R54X,TP53:NM_0012766<br>99:exon2:c.C160T:p.R54X,TP5<br>3:NM_001126118:exon5:c.C52<br>0T:p.R174X,TP53:NM_000546:<br>exon6:c.C637T:p.R213X,TP53:<br>NM_001126112:exon6:c.C637T:<br>p.R213X,TP53:NM_001126113:<br>exon6:c.C637T:p.R213X,TP53:<br>NM_001126114:exon6:c.C637T:<br>p.R213X,TP53:NM_001276695<br>:exon6:c.C520T:p.R174X,TP53:<br>NM_001276696:exon6:c.C520T<br>:p.R174X,TP53:NM_00127676<br>0:exon6:c.C520T:p.R174X,TP5<br>3:NM_001276761:exon6:c.C52<br>0T:p.R174X |
|  | SMAD4 | NM_005359                                                                                                                                                                                                                               | exonic            | stopgain | SMAD4:NM_005359:exon3:c.C<br>403T:p.R135X                                                                                                                                                                                                                                                                                                                                                                                                                                                                                                                                                                                                                                                              |
|  | SMAD4 | NM_005359                                                                                                                                                                                                                               | Intronic mutation |          |                                                                                                                                                                                                                                                                                                                                                                                                                                                                                                                                                                                                                                                                                                        |
|  | P16   | No mutation was found                                                                                                                                                                                                                   |                   |          |                                                                                                                                                                                                                                                                                                                                                                                                                                                                                                                                                                                                                                                                                                        |

**Supplementary table6: shRNA sequences for stable knockdown cell lines**

|                                     |                                                                          |
|-------------------------------------|--------------------------------------------------------------------------|
| Human EHF shRNA1 (most efficient)   | Top:<br>ccggGCCAATTGTATCCCTTTCCAAC TCGAGTTGGAAAGGGATACAATTG<br>GCtttt    |
|                                     | Bottom:<br>aattaaaaGCCAATTGTATCCCTTTCCAAC TCGAGTTGGAAAGGGATACA<br>ATTGGC |
| Human EHF shRNA2                    | Top:<br>ccggGGGAGTTCATCCGAGACATTCTCGAGGAATGTCTCGGATGAACT<br>CCCtttt      |
|                                     | Bottom:<br>aattaaaaGGGAGTTCATCCGAGACATTCTCGAGGAATGTCTCGGATG<br>AACTCCC   |
| Human EHF shRNA2                    | Top:<br>ccggAGTCCGCACACAATGTCATTGCTCGAGCAATGACATTGTGTGCGG<br>ACtttt      |
|                                     | Bottom:<br>aattaaaaAGTCCGCACACAATGTCATTGCTCGAGCAATGACATTGTGTG<br>CGGAC   |
| Human CXCR4 shRNA1                  | Top<br>ccggCCATCATCTTCTTAACTGGCAtttt                                     |
|                                     | Bottom<br>aattaaaaCCATCATCTTCTTAACTGGCA                                  |
| Human CXCR4 shRNA2 (most efficient) | Top<br>ccggCCTGCTATTGCATTATCATCTtttt                                     |
|                                     | Bottom<br>aattaaaaCCTGCTATTGCATTATCATCT                                  |
| Human CXCR4 shRNA 3                 | Top<br>ccggGGAGAGTTGTAGGATTCTACA tttt                                    |
|                                     | Bottom<br>aattaaaaGGAGAGTTGTAGGATTCTACA                                  |

**Supplementary table 7: Primers used for genotyping of KPC mice model**

| <b>Primer name</b>                         | <b>Sequence(5'-3')</b>                    |
|--------------------------------------------|-------------------------------------------|
| Trp53-primer1                              | CTT GGA GAC ATA GCC ACA CTG               |
| Trp53-primer2                              | AGC TAG CCA CCA TGG CTT GAG TAA GT        |
| Trp53-primer3                              | CAA CTG TTC TAC CTC AAG AGC C             |
| Kras-primer1                               | GTC TTT CCC CAG CAC AGT GC                |
| Kras-primer2                               | CTC TTG CCT ACG CCA CCA GCT C             |
| Kras-primer3                               | AGC TAG CCA CCA TGG CTT GAG TAA GTC TGC A |
| Pdx1-Cre-internal positive control forward | AGA TGG AGA AAG GAC TAG GCT ACA           |
| Pdx1-Cre-internal positive control reverse | CTG TCC CTG TAT GCC TCT GG                |
| Pdx1-Cre-transgene forward                 | CCT GGA CTA CAT CTT GAG TTG C             |
| Pdx1-Cre-transgene reverse                 | AGG CAA ATT TTG GTG TAC GG                |



**Supplementary table8: PCR procedure for genotyping of KPC mice model**

|          |                                                                                                                                                                                                                               |
|----------|-------------------------------------------------------------------------------------------------------------------------------------------------------------------------------------------------------------------------------|
| Trp53    | Step1: 94°C 3min;<br>Step2: 94°C 1min, 60°C 30s, 72°C 30s (34 repeats for step2);<br>Step3: 72°C 5min;<br>End.                                                                                                                |
| Kras     | Step1: 94°C 5min;<br>Step2: 94°C 30s, 61°C 30s, 72°C 30s (34 repeats for step2);<br>Step3: 72°C 10min;<br>End.                                                                                                                |
| Pdx1-Cre | Step1: 94°C 3min;<br>Step2: 94°C 30s, 65°C 1min(-0.5°C per cycle decrease), 68°C 30s (10 repeats for step2);<br>Step3: 94°C 30s;<br>Step4: 94°C 30s, 60°C 1min, 72°C 30s (28 repeats for step4);<br>Step5: 72°C 5min;<br>End. |

**Supplementary table9: Antibodies used in this study**

| <b>Antibodies name</b>                           | <b>Dilution</b> | <b>Source</b>   | <b>Cat #</b> |
|--------------------------------------------------|-----------------|-----------------|--------------|
| Anti-human EHF antibody (for WB)                 | 1:5000          | LSBio           | LS-B11884    |
| Anti-human EHF antibody (for IHC and Ch-IP)      | 1:1000          | abcam           | ab220113     |
| Anti-human Sox9 antibody (for WB and IHC)        | 1:1000          | abcam           | ab185230     |
| Anti-human Sox2 antibody (for WB and IHC)        | 1:1000          | Proteintech     | 66411-1-Ig   |
| Anti-human Nanog antibody (for WB and IHC)       | 1:1000          | abcam           | ab109250     |
| Anti-human Oct4 antibody (for WB and IHC)        | 1:1000          | abcam           | ab18976      |
| Anti-human CXCR4 antibody (for WB and IHC)       | 1:1000          | abcam           | ab124824     |
| Anti-human CD133 antibody (for mIHC)             | 1:100           | Miltenyi Biotec | 130-118-143  |
| Anti-human tubulin antibody (for WB)             | 1:5000          | abmart          | M20005       |
| Anti-human ALDH1 antibody (for mIHC)             | 1:1000          | BD              | 611194       |
| Anti-human PPAR $\gamma$ antibody (for Ch-IP)    | 1:10            | abcam           | ab45036      |
| Anti-human carbonic anhydrase2 antibody (for WB) | 1:1000          | abcam           | ab124687     |
| Anti-human CK19 antibody (for WB)                | 1:1000          | abcam           | ab7755       |
| Anti-human E-cadherin antibody (for WB)          | 1:1000          | abcam           | ab1416       |
| PE/Cy7 anti-human EpCAM antibody (for FCM)       | 5 $\mu$ l/test  | Biolegend       | 324222       |
| FITC anti-human CD24 antibody (for FCM)          | 5 $\mu$ l/test  | Biolegend       | 101805       |
| PE anti-human CD24 antibody (for FCM)            | 5 $\mu$ l/test  | Biolegend       | 311106       |
| APC anti-human CD44 antibody (for FCM)           | 5 $\mu$ l/test  | Biolegend       | 338806       |
| APC/Cy7 anti-human CXCR4 antibody (for FCM)      | 5 $\mu$ l/test  | Biolegend       | 306528       |
| PE anti-human CD133 antibody (for FCM)           | 5 $\mu$ l/test  | Biolegend       | 372804       |
| Anti-human IL6 antibody (for neutralizing)       | 5 $\mu$ g/ml    | R&D             | MAB206       |

|                                                                                                                                                      |        |          |           |
|------------------------------------------------------------------------------------------------------------------------------------------------------|--------|----------|-----------|
| Anti-human IL8 antibody (for neutralizing)                                                                                                           | 5µg/ml | R&D      | MAB208    |
| Anti-human GRO antibody (for neutralizing)                                                                                                           | 5µg/ml | R&D      | AF275     |
| Anti-human CSF2 antibody (for neutralizing)                                                                                                          | 5µg/ml | R&D      | MAB215    |
| Anti-human MCP1 antibody (for neutralizing)                                                                                                          | 5µg/ml | R&D      | MAB279    |
| Anti-human PDGF antibody (for neutralizing)                                                                                                          | 5µg/ml | R&D      | AF-220-NA |
| Anti-human CXCL12/SDF-1 antibody (for neutralizing)                                                                                                  | 5µg/ml | R&D      | MAB310    |
| Anti-human activin-A antibody (for neutralizing)                                                                                                     | 5µg/ml | R&D      | AF338     |
| Anti-human periostin antibody (for neutralizing)                                                                                                     | 5µg/ml | R&D      | MAB35483  |
| Anti-human CTGF antibody (for neutralizing)                                                                                                          | 5µg/ml | Fibrogen | FG-3019   |
| Anti-human endothelin antibody (for neutralizing)                                                                                                    | 5µg/ml | R&D      | MAB34401  |
| Mouse IgG1 isotype control (for matching with anti-IL6, anti-IL8, anti-CXCL12, anti-CSF-2, anti-MCP1, anti-periostin, anti-CTGF and anti-endothelin) | 5µg/ml | R&D      | MAB002    |
| Polyclonal Goat IgG isotype control (for matching with anti-GRO, anti-PDGF, anti-activin-A)                                                          | 5µg/ml | R&D      | AB-108-C  |

**Supplementary table10: Primers used for RT-PCR and Ch-IP in this study**

| Gene name                                   | Forward                   | Reverse                    |
|---------------------------------------------|---------------------------|----------------------------|
| <b>h EHF</b>                                | TGCAGCATCTGAAGTGGA<br>AC  | AGGAAGGTGACTGGTGGTTG       |
| <b>hSox9</b>                                | GCTCTGGAGACTTCTGAA<br>CGA | CCGTTCTTCACCGACTTCCT       |
| <b>hSox2</b>                                | ACACCAATCCCATCCACAC<br>T  | GCAAACCTTCTGCAAAGCTC       |
| <b>h Nanog</b>                              | TTCCTTCTCCATGGATCT<br>G   | ATCTGCTGGAGGCTGAGGTA       |
| <b>hOct4</b>                                | GAAGGATGTGGTCCGAGT<br>GT  | GTGAAGTGAGGGCTCCCATA       |
| <b>hCXCR4</b>                               | GAACCCTGTTTCCGTGAA<br>GA  | AGGGAAGCGTGATGACAAAG       |
| <b>hCXCR7</b>                               | CAAAACAGGGCTCACCAA<br>GC  | GCCGGTACAAAACACCACAC       |
| <b>h Actin</b>                              | ACCCTGAAGTACCCATC<br>GAG  | AGCACAGCCTGGATAGCAAC       |
| <b>EHFCh-IP-Sox9-1</b>                      | AGAGCCCTGGATACGAAG        | TCCCAAATAAACGCACAG         |
| <b>EHFCh-IP-Sox9-2</b>                      | GCCGATTCACCACAACAA        | GCACCACCGCAGACAAAA         |
| <b>EHFCh-IP-Sox2-1</b>                      | GCGTGGGAGGGAGTTTGT        | AGAAGGGTTTCGGTCGTG         |
| <b>EHFCh-IP-Nanog-1</b>                     | CCCCTTAACAAACTGTGC        | TCCTTCTATTCCCAAAC          |
| <b>EHFCh-IP-Nanog-2</b>                     | TTGAATGTTGGGTTTGGG        | TAGGGTGATTTCTTGATTTGA<br>G |
| <b>EHFCh-IP-Oct4-1</b>                      | GCATTCCGTTGGCTATTC        | GGGCAGCTCTAACCCATAA        |
| <b>EHFCh-IP-CXCR4-1</b>                     | GGGATGTCTTGAGCGAG<br>TT   | CCCTCTGCCTACTGTGCTG        |
| <b>PPAR <math>\gamma</math> Ch-IP-EHF-1</b> | GGTTAATCTCAGGCAATG        | AGACAAATCAGGCACAAC         |
| <b>PPAR <math>\gamma</math> Ch-IP-EHF-2</b> | ACAGTCACCACCAAATCA        | TAAGCAATAAGCCACCAA         |

**Supplementary table11: Sequence of the vectors for luciferase analysis**

| CXCR4 promoter-EBS1-wt (yellow region stands for EBS1-wt sequence)                                                                                                                                                                                                                                                                                                                                                                                                                                                                                                                                                                                                                                                                                                                                                                                                                                                                                                                                                                                                                                                                                                                                                                                                                                                                                                                                                                                                                                                                                                                                                                                                                                                                                                                                                                                                                                                                                                                                                                                                                                                                                         |
|------------------------------------------------------------------------------------------------------------------------------------------------------------------------------------------------------------------------------------------------------------------------------------------------------------------------------------------------------------------------------------------------------------------------------------------------------------------------------------------------------------------------------------------------------------------------------------------------------------------------------------------------------------------------------------------------------------------------------------------------------------------------------------------------------------------------------------------------------------------------------------------------------------------------------------------------------------------------------------------------------------------------------------------------------------------------------------------------------------------------------------------------------------------------------------------------------------------------------------------------------------------------------------------------------------------------------------------------------------------------------------------------------------------------------------------------------------------------------------------------------------------------------------------------------------------------------------------------------------------------------------------------------------------------------------------------------------------------------------------------------------------------------------------------------------------------------------------------------------------------------------------------------------------------------------------------------------------------------------------------------------------------------------------------------------------------------------------------------------------------------------------------------------|
| <p>tccccaccccgcttctccctccccgcccagcggcgcatgcgccgcgctcggagcgtgttttataaaagt<br/> ccggccgcccagaaacttcagtttgttggtgctgcccagcaggtagcaaagtgacgccgagggcctgagtgc<br/> tccagtagccaccgcatctggagaaccagcggttaccatggaggggatcagtgtaagtccagtttcaacctgc<br/> tttgcataaatgtacaaacgtttgaacttagagcgcagcccctctccgagcgggcagaagcggccaggacat<br/> tggaggtaccgtactccaaaaagggtcaccgaaaggagttttcttgaccatgcctatatagtgccgggtggg<br/> tggggggggagcaggattggaatcttttctctgtgagtcgaggagaaacgactggaaagagcgttccagtg<br/> ctgcatgtgtctcccccttgagtcgccgcgcgccggcgttgacgctgtttgcaaactgaagaacattct<br/> gtgcacaagtgcagagaaggcgtgcccgtgctcgggactcagaccaccggtctcttccttggggaagcggg<br/> gatgtcttggagcagttacattgtctgaatttagaggcggagggcggtgctgctgggctgagttccaggag<br/> gagattgccccgcttt<b>aacttcggggtt</b>aagcgcctggtgactgttcttgacactgggtgctgtttgttaa<br/> actctgtgcccgcagcggagctgtgcccagtcctccagcacagtaggcagagggcgggagaggcgggtggacc<br/> accgcccgatcctctgaggggatcagtggtggcagcagctaggagttgatccgccgcgctttgggtt<br/> gagggggaaaccttcccgcgtccgaagcgcctcttccccacggccgcagtgggctcctgcagttcgaga<br/> gtttggggtcgtgcagaggtcagcggagtggttgacctcccccttgacaccgcgagctgcagccctgaga<br/> tttgcgctccgggataggagcgggtacgggtgagggcgggggcggttaagaccgcacctgggctccagg<br/> tcgcccgcgaagactggcaggtgcaagtgggaaaccgtttggctctctccgagtcagttgtgatgttta<br/> accgtcgggtggtttccagaaacctttgaaacctcttgctagggagttttggtttctgcagcggcgca<br/> attcaaagacgctcggcgagcggccagtcgctccccagcaccctgtgggacagagcctggcgtgcgcc<br/> cagcggagcccctgcagcgtgcttgcccggcgttggtgtagtgggcagccgcccggccggggct<br/> ggacgaccggcccccgctgcccaccgctggaggcttccagctgcccacctccggcgggtaactggat<br/> cagtgccgggtaattgggaagccaccgggagagtgaggaaatgaaactggggcaggaccaggggtcaga<br/> ccccgttaccttccaccaggaaaatgcccgcctcctaactccaaacgcgccaagtataaacacgag<br/> gatggcaagagaccacacacgggagcgccttgggggaggaggtgcccgtttgttattttctgacac<br/> tcccgcccaatatacccaagcaccgaaggccttctgttttaagaccgattctctttaccactacaagt<br/> tgcttgaagcccagaatggttgtatttaggcaggcgtgggaaaattaagttttgctttaggagaatgag<br/> tctttgcaacgccccgcccctccccgtgatcctccttctcccctcttccctccctggggcaaaaactct<br/> tcaaaaaagttaatcactgcccctctagcagaccaccacccccaccccgccctgggagtgccctctt<br/> gtgtgtatttttttttctcctaaggaagg</p> |
| CXCR4 promoter-EBS1-mut (yellow region stands for EBS1-mut sequence)                                                                                                                                                                                                                                                                                                                                                                                                                                                                                                                                                                                                                                                                                                                                                                                                                                                                                                                                                                                                                                                                                                                                                                                                                                                                                                                                                                                                                                                                                                                                                                                                                                                                                                                                                                                                                                                                                                                                                                                                                                                                                       |
| <p>Tccccaccccgcttctccctccccgcccagcggcgcatgcgccgcgctcggagcgtgttttataaaagt<br/> ccggccgcccagaaacttcagtttgttggtgctgcccagcaggtagcaaagtgacgccgagggcctgagtgc<br/> tccagtagccaccgcatctggagaaccagcggttaccatggaggggatcagtgtaagtccagtttcaacctgc<br/> tttgcataaatgtacaaacgtttgaacttagagcgcagcccctctccgagcgggcagaagcggccaggacat<br/> tggaggtaccgtactccaaaaagggtcaccgaaaggagttttcttgaccatgcctatatagtgccgggtggg<br/> tggggggggagcaggattggaatcttttctctgtgagtcgaggagaaacgactggaaagagcgttccagtg<br/> ctgcatgtgtctcccccttgagtcgccgcgcgccggcgttgacgctgtttgcaaactgaagaacattct<br/> gtgcacaagtgcagagaaggcgtgcccgtgctcgggactcagaccaccggtctcttccttggggaagcggg<br/> gatgtcttggagcagttacattgtctgaatttagaggcggagggcggtgctgctgggctgagttccaggag<br/> gagattgccccgcttt<b>tttttttttt</b>aagcgcctggtgactgttcttgacactgggtgctgtttgttaa<br/> actctgtgcccgcagcggagctgtgcccagtcctccagcacagtaggcagagggcgggagaggcgggtggacc<br/> accgcccgatcctctgaggggatcagtggtggcagcagctaggagttgatccgccgcgctttgggtt<br/> gagggggaaaccttcccgcgtccgaagcgcctcttccccacggccgcagtgggctcctgcagttcgaga</p>                                                                                                                                                                                                                                                                                                                                                                                                                                                                                                                                                                                                                                                                                                                                                                                                                                                                                                                                                                                                                                                                                                               |

gtttggggtcgtgcagagggtcagcggagtggtttgacctcccccttgacaccgcgcagctgccagccctgaga  
tttgcgctccggggataggagcgggtacggggtgaggggccccgggtaagaccgcacctgggctgccagg  
tcgccgccgaagactggcaggtgcaagtggggaaacggttggctctctccgagtcagttgtgatgttta  
accgtcgggtggtttcagaaacctttgaaacctcttctagggagttttggtttctgcagcggcgcgca  
attcaaagacgctcgcggcggagcccccagtcgctccccagcacctgtgggacagagcctggcgtgcgcc  
cagcggagccccctgcagcgtgcttgcggcggttggcgtgggtgtagtgggacagccgcggcggccccgggct  
ggacgaccggcccccgctgcccaccgctggaggcttccagctgcccacctccggcgggtaactggat  
cagtgccgggtaatgggaagccaccgggagagtgaggaaatgaaacttggggcaggaccacgggtgcaga  
ccccgttaccttctccaccaggaaatgccccgctcctaactccaaacgcgccaagtataaacacgag  
gatggcaagagaccacacacggaggagcggcgttgggggaggaggtgccgtttgttattttctgacac  
tcccgcccaatataccccaagcaccgaaggccttctgttttaagaccgattctctttaccactacaagt  
tgcttgaagcccagaatggtttgtatttaggcaggcgtgggaaaattaagttttgcgttttaggagaatgag  
tctttgcaacgccccgccccctgctcctctctccctcttccctccctgggcgaaaaacttct  
tacaanaagttaatcactgcccccttagcagcaccacccccaccccgccctgggagtgccctctt  
gtgtgtatttttttttctcctaaggaagg

#### EHF promoter-PPRE1/2-wt

tggtcagagagccacatcacttttgggttcatttgaagttcactatctcttgaccacacaaccctagccc  
ttctactcccaccctgctgtctcaggttaatctcaggcaatggtgtaaagaaggccaagttgtttccctgga  
gtcccacgggctctagcaataatgcttcccccttctcagtgctccccgcacccaccccccttcacatcat  
acacacaaatgccctgcagtggtggaatgtagttacttcaggttgctcctgatttgtctctcaagcaaaact  
ccagcaggcattccctcaggccctgctctcagatctggaactgatagactaattggggctaatgtgataat  
gggaaataatgaaattgtttttatcagtggtatgaggggggggttacatttgcattttcacagggc  
ccttgcaagttcacagggtgaacagttgggaagggtgggaatgctggggcaggttagggaggcagaggga  
tttattagaactcccctaaactgcactgaccaaagcctcaagccttctcaagactgccagcttccaaga  
ccttccaagtccacccttgttttccactgagcttttacactttcagaaacctgaattgtgtagaac  
tagaaaaataagtaagaaaagactaataactactgcacactcactgttcccccttaataataaacagttt  
tatctattcagtcagcctttgaccataagcagaccttttttttcttttaacacaagtaacttcttggtt  
tgatcaciaaatctttatctctgcaaatctcaacttcccttccctctcccaaaaaggaggcccgttgagt  
caagaaatctgcttagacactttgctcatgccaggccagtgctcctggaaggttcaacagagaaagttaatgg  
ttgggggatggtattttcttctgtaggagcagtcattcaccgtagggagaaggtacatttgtgaccaggt  
gaagcaggtacaggttaactcccataatgtcccttgcccaagggaatagaggttgcctgggtatttgaatccg  
tagatcctccctaataattccacttcttctgtccaaactgtgctttttatttccagtttcagcattttggt  
cttctcatcttaactcttataggagtgtaataaaccttttaaaaagatcatgtaagtcaagaggaag  
tgaagaactagataatccaccaaccggataatcagctcttgcatattgagagttgactgcttgacctaac  
atctctcataaggtaccctccctccaggaccttcccttcaaacctctcaaggtcttacctggggccagg  
ggagataggctttcaagtcattgaattgccaagagctctgtcaagaaggcagtcaggtgcctggagag  
ggaacttgcctgggagccccctcagagcctggtacttatagagctagggaaaagatcttgatgcaaaagcagg  
tggactaaatacagactaataaatgagacaggtgctcaagaggccccctcacaatcatctcctccagatt  
tggacttctactcatttgcctttacattcccttccgatggtgctttgggtgagcagggtgcttttacc  
tgaacagcctctgagctgaaaagaacagtcaccaccaaatcaattcctcatcattaacaggttctctct  
gttcttgagacacaggcattacctggttagacctgtttgtttgaaactaacgtgtgagttggcaaatgca  
aatgagccagtggttgaatcctttatttttttaagggtgggttagcaatcagaaggggggaagt  
gacttagggaattccgggttggtgcttattgcttaacatcctacaaaatgattttaaattattgttatatgc  
atctatcttactctgatgagggtcag
