# Supplementary material
Source: HighWire-hosted journal article supplement (https://gut.bmj.com/content/71/2/357)
Supplement: inline-supplementary-material-3 [file inline-supplementary-material-3.pdf]

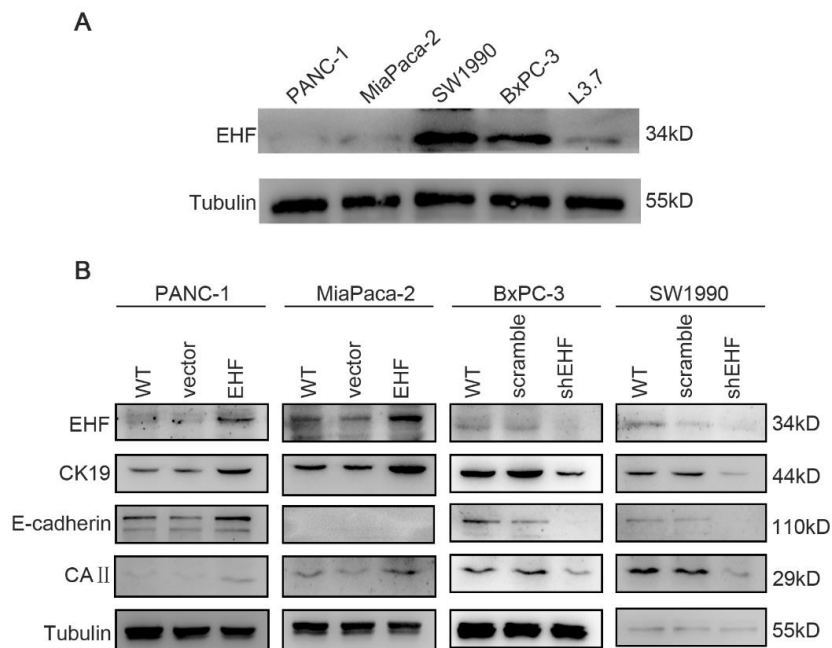

**Supplementary figure 2.** (A) Western blot for the basal expression of ESE3/EHF in five PDAC cancer cell lines (B) Western blot for the expression of differentiation markers (CA II , E-cadherin and CK19) in PANC-1-vector/EHF, MiaPaca-2-vector/EHF, BxPC-3-scramble/shEHF and SW1990-scramble/shEHF cell lines.
