# Supplementary material
Source: HighWire-hosted journal article supplement (https://gut.bmj.com/content/71/2/357)
Supplement: inline-supplementary-material-5 [file inline-supplementary-material-5.pdf]

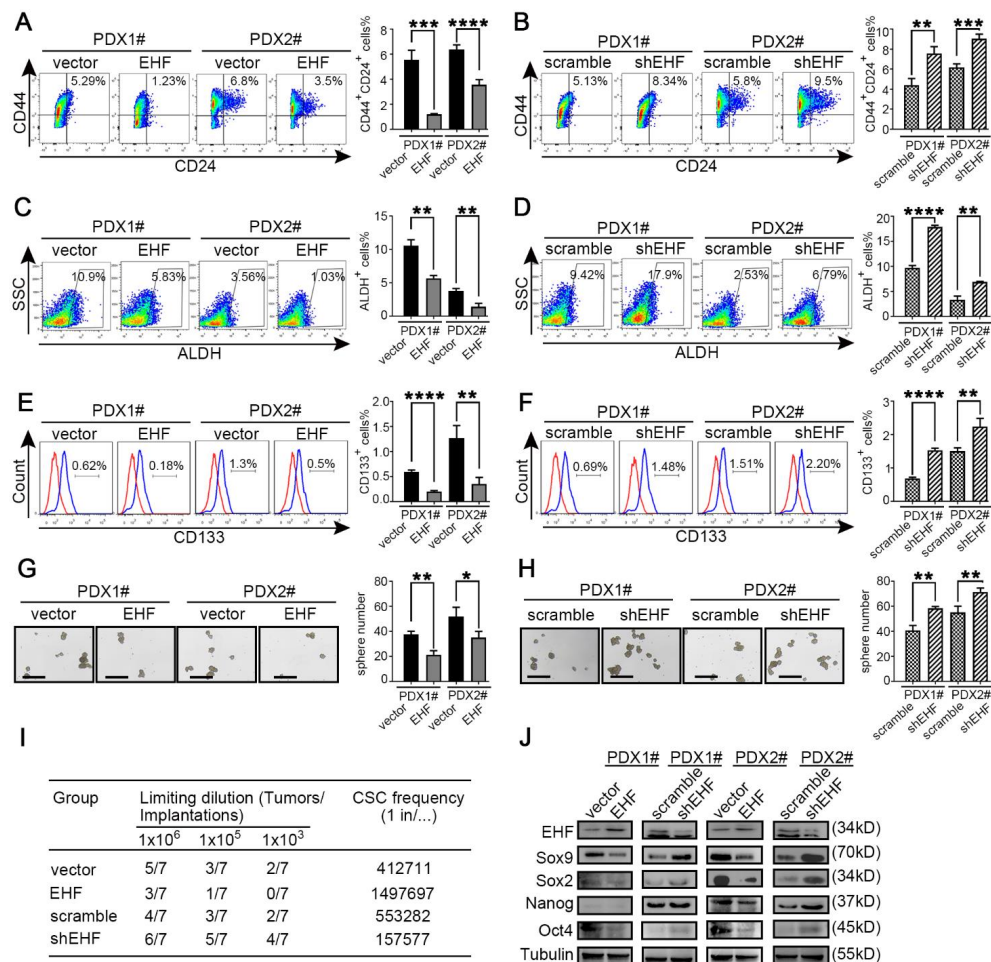

**Supplementary figure 4.** Tumoral EHF regulates pancreatic cancer stemness in PDX1#-vector/EHF, PDX1#-scramble/shEHF, PDX2#-vector/EHF and PDX2#-scramble/shEHF. (A-B) The proportion of CD44<sup>+</sup>CD24<sup>+</sup> cells in indicated cell lines were analyzed using flow cytometry. Representative dot plots (A, left; B, left) and percentage of CD44<sup>+</sup>CD24<sup>+</sup> cells (A, right; B, right) were shown. (C-D) The proportion of ALDH<sup>+</sup> cells in indicated cells were analyzed using flow cytometry. Representative dot plots (C, left; D, left) and percentage of ALDH<sup>+</sup> cells (C, right; D, right) were shown. (E-F) The proportion of CD133<sup>+</sup> cells in indicated cells were analyzed using flow cytometry. Representative histograms (E, left; F, left) and percentage of CD133<sup>+</sup> cells (E, right; F, right) were shown. (G-H) Sphere formation assays were performed in indicated cell lines. Representative images (G, left; H, left) and sphere number analysis (G, right; H, right) were shown. Bars:100 $\mu$ m. (I) In vivo limited dilution assays for PDX1#-vector/EHF and PDX1#-scramble/shEHF cell lines were performed. Representative tumor incidence and CSC probabilities were shown. (J) Western blot on EHF, Sox9, Sox2, Nanog and Oct4 were analyzed in indicated cell lines.  $\beta$ -tubulin was used as loading control. Representative results were shown. All experiments were repeated three times independently. Paired Student's t-test were used for in vitro experiments. \* $P$ <0.05, \*\* $P$ <0.01, \*\*\* $P$ <0.001 and \*\*\*\* $P$ <0.0001.
