# Supplementary material
Source: HighWire-hosted journal article supplement (https://gut.bmj.com/content/71/2/357)
Supplement: inline-supplementary-material-7 [file inline-supplementary-material-7.pdf]

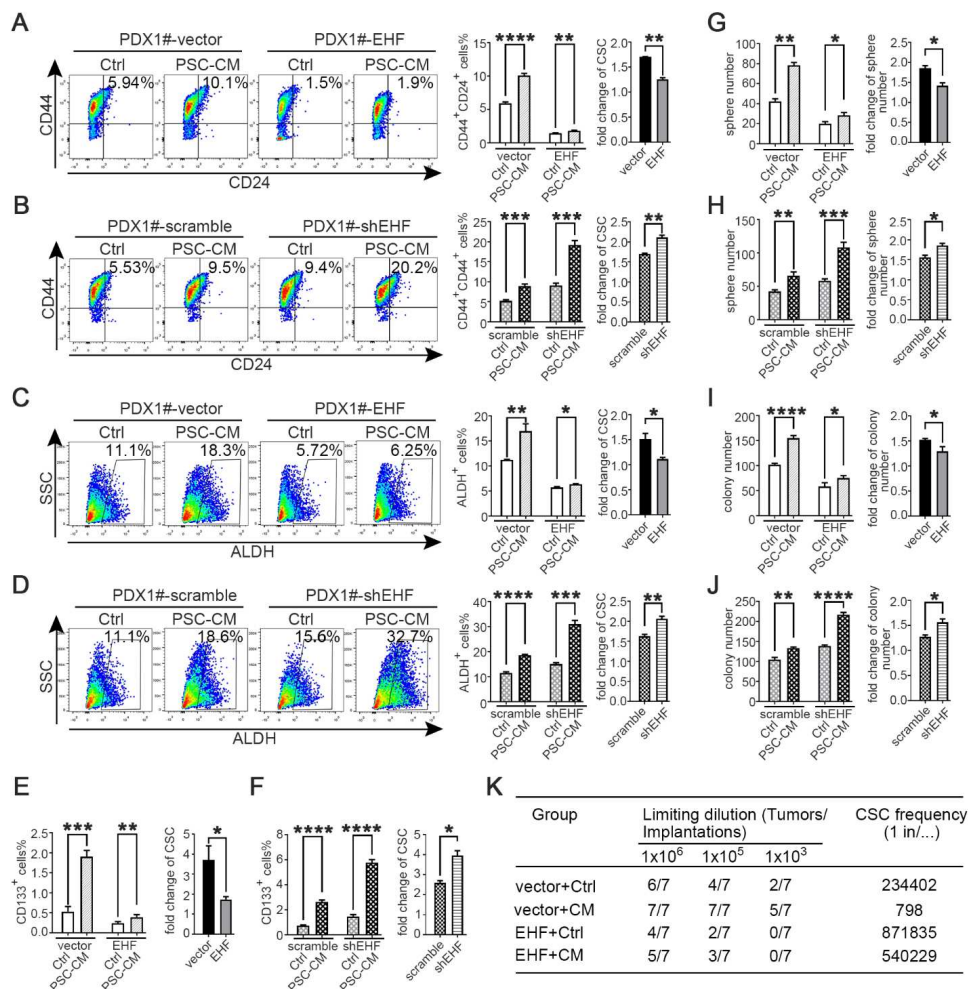

**Supplementary figure 6.** Data from another primary PDX1#-vector/EHF or PDX1#-scramble/shEHF cell lines culturing with PSC-CM. (A-F) PDX1#-vector, PDX1#-EHF, PDX1#-scramble and PDX1#-shEHF were cultured with PSC-CM or the control medium. The percentage of PCSCs in each cell line under each treatment were shown, the fold change of the percentage of PCSCs in each cell line after culturing with PSC-CM was calculated: (A-B) CD24<sup>+</sup>CD44<sup>+</sup> cells, (C-D) ALDH<sup>+</sup> cells, (E-F) CD133<sup>+</sup> cells. Representative dot plots (for CD24<sup>+</sup>CD44<sup>+</sup> cells and ALDH<sup>+</sup> cells), the statistical analysis of CSC percentage of each group and the statistical analysis of the fold change in each cell line. (G-H) Statistical analysis of the sphere number of each cell line under the treatment of serum-free medium and serum-free medium with PSC-CM added (left), statistical analysis of the fold change of sphere number after culturing with serum-free medium containing PSC-CM in each cell line (right). (I-J) Statistical analysis of the soft agar colony number of each cell line under the treatment of control medium and PSC-CM (left). Statistical analysis of the fold change of colony number after culturing with PSC-CM in each cell line (right). (K) In vivo limited dilution assay was performed to determine the effects of PSC-CM on CSC self-renewal of PDX1#-vector/EHF. Representative tumor incidence and CSCs probabilities were shown. All experiments were repeated three times

independently. Paired Student's t-test was used for statistical analysis. \* $P < 0.05$ , \*\* $P < 0.01$ , \*\*\* $P < 0.001$ , \*\*\*\* $P < 0.0001$  and n.s. means non-significant.
