# Supplementary material
Source: HighWire-hosted journal article supplement (https://gut.bmj.com/content/71/2/357)
Supplement: inline-supplementary-material-9 [file inline-supplementary-material-9.pdf]

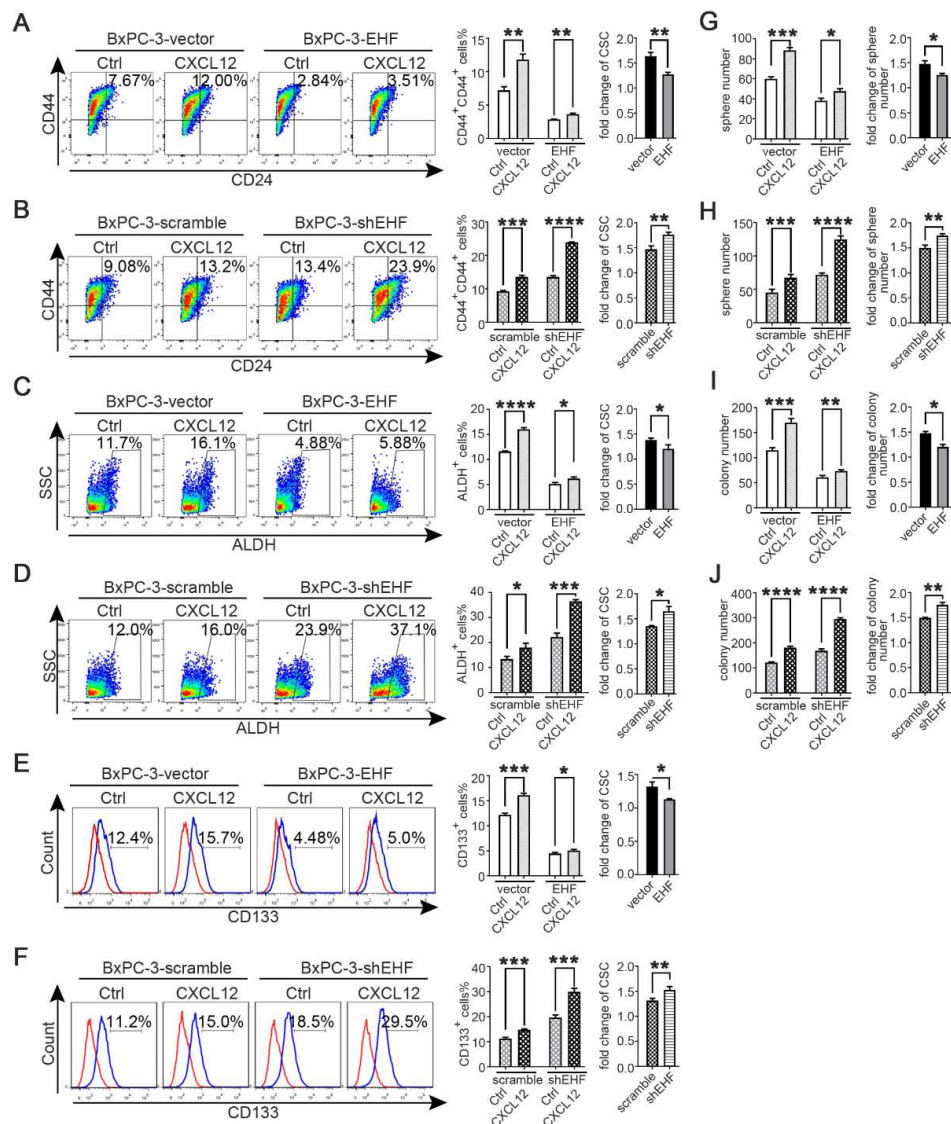

**Supplementary figure 8.** Data from another BxPC-3-vector/EHF and BxPC-3-scramble/shEHF cell lines treating with recombinant human CXCL12/SDF-1 $\alpha$ . (A-F) BxPC-3-vector, BxPC-3-EHF, BxPC-3-scramble and BxPC-3-shEHF were cultured with medium containing CXCL12 or the control medium. The percentage of PCSCs in each cell line under each treatment were shown, the fold change of the percentage of PCSCs in each cell line after culturing with medium containing CXCL12 was calculated: (A-B) CD24<sup>+</sup>CD44<sup>+</sup> cells, (C-D) ALDH<sup>+</sup> cells, (E-F) CD133<sup>+</sup> cells. Representative dot plots/histogram (left), the statistical analysis of CSC percentage of each group (medium) and the statistical analysis of the fold change in each cell line (right). (G-H) Statistical analysis of the sphere number of each cell line under the treatment of serum-free medium and serum-free medium with CXCL12 added (left), statistical analysis of the fold change of sphere number after culturing with serum-free medium containing CXCL12 in each cell line (right). (I-J) Statistical analysis of the soft agar colony number of each cell line under

the treatment of control medium and medium containing CXCL12 (left), statistical analysis of the fold change of colony number after culturing with medium containing CXCL12 in each cell line (right). All experiments were repeated three times independently. Paired Student's t-test was used for statistical analysis. \* $P < 0.05$ , \*\* $P < 0.01$ , \*\*\* $P < 0.001$ , \*\*\*\* $P < 0.0001$  and n.s. means non-significant.
