# Supplementary material
Source: HighWire-hosted journal article supplement (https://gut.bmj.com/content/71/2/357)
Supplement: inline-supplementary-material-11 [file inline-supplementary-material-11.pdf]

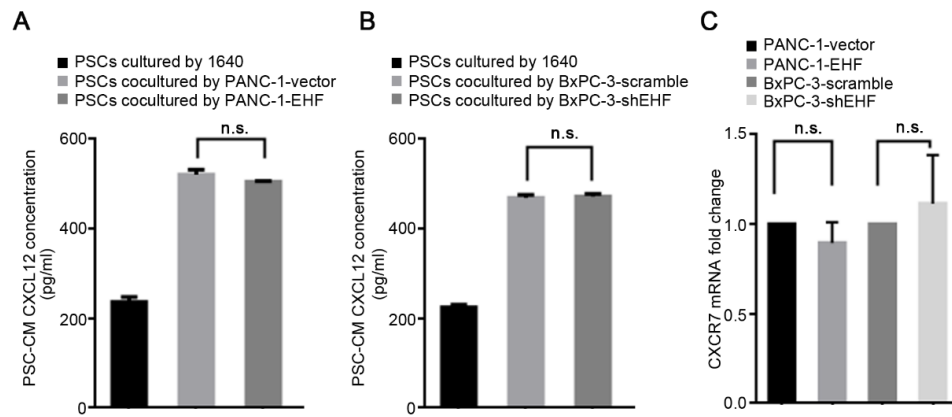

**Supplementary figure 10.** (A-B) ELISA assay for CXCL12 protein in conditioned medium of PSCs indirectly cocultured by PANC-1-vector/EHF and BxPC-3-scramble/shEHF cell lines (1640 was used as control). Representative results were shown (PANC-1, A; BxPC-3, B). (C) CXCR7 mRNA expression was determined in PANC-1-vector/EHF and BxPC-3-scramble/shEHF cell lines. All experiments were repeated three times independently. Paired Student's t-test was used as statistical analysis and n.s. means non-significant.
