# Supplementary material
Source: HighWire-hosted journal article supplement (https://gut.bmj.com/content/71/2/357)
Supplement: inline-supplementary-material-12 [file inline-supplementary-material-12.pdf]

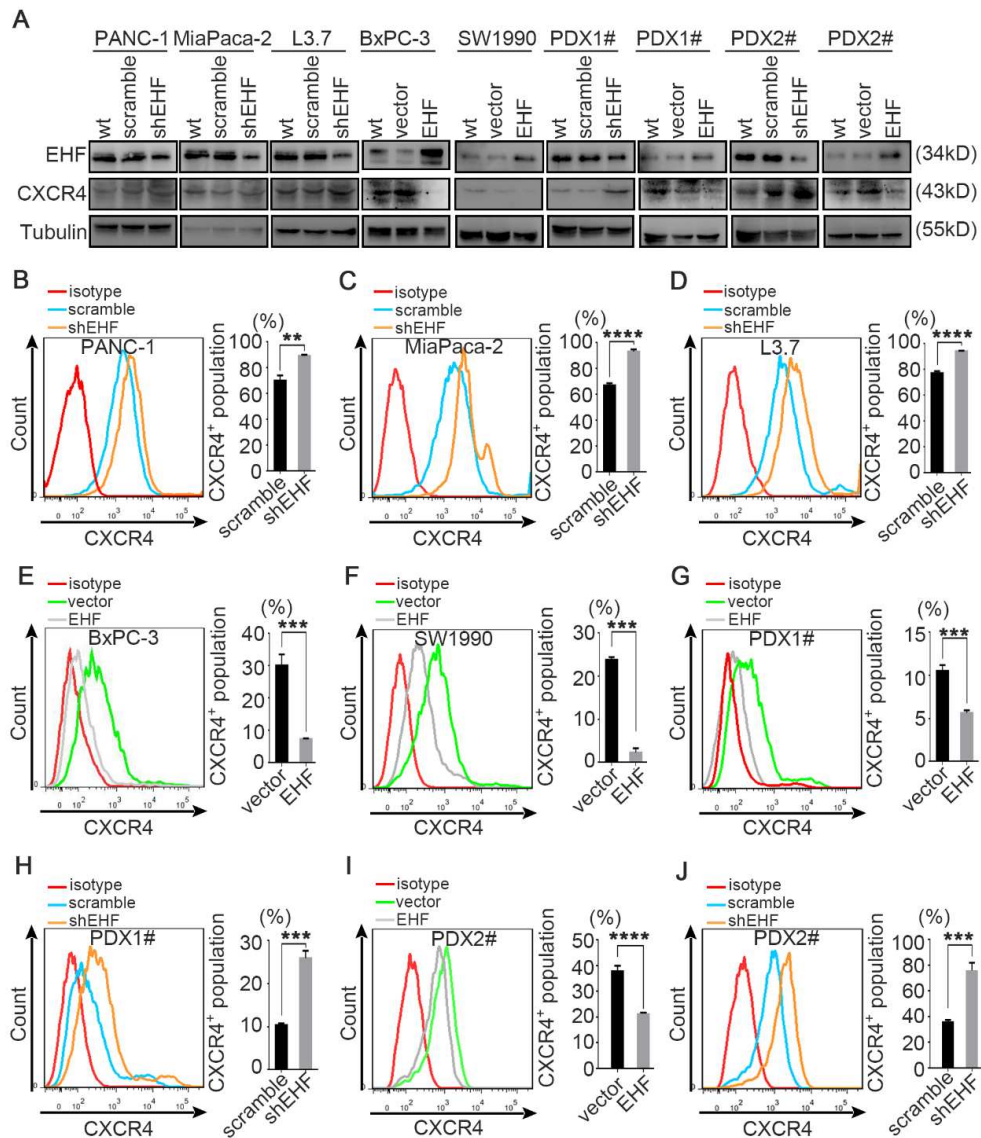

**Supplementary figure 11.** EHF negatively regulated the expression of CXCR4 in newly established PDAC cell lines. (A) Total protein expression of EHF and CXCR4 were validated in indicated cell lines by western blot. Tubulin was used as loading control. Representative results were shown. (B-J) Percentage of CXCR4<sup>+</sup> population in indicated cell lines were analyzed by flowcytometry. Isotype was used as negative control. Representative histogram and statistical analysis were shown. All experiments were repeated three times independently. Paired Student's t-test were used for statistical analysis. \*P<0.05, \*\*P<0.01, \*\*\*P<0.001, \*\*\*\*P<0.0001.
