# Supplementary material
Source: HighWire-hosted journal article supplement (https://gut.bmj.com/content/71/2/357)
Supplement: inline-supplementary-material-13 [file inline-supplementary-material-13.pdf]

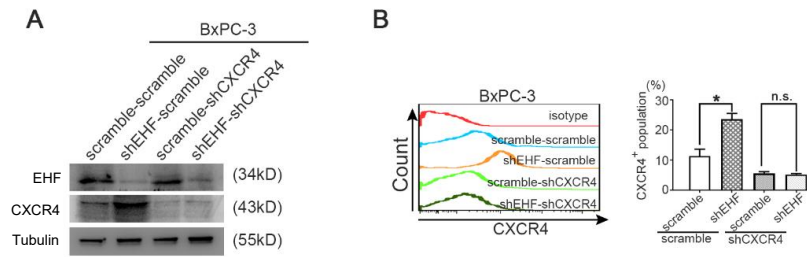

**Supplementary figure 12.** (A) Protein expression of EHF and CXCR4 were detected in BxPC-3-scramble-scramble/shCXCR4 and BxPC-3-shEHF-scramble/shCXCR4 cell lines by western blot. Representative results were shown. (B) Percentage of CXCR4<sup>+</sup> population were analyzed in indicated cell lines by flow cytometry. Representative histograms (left) and percentage of CXCR4<sup>+</sup> population (right) were shown.
