# Supplementary material
Source: HighWire-hosted journal article supplement (https://gut.bmj.com/content/71/2/357)
Supplement: inline-supplementary-material-14 [file inline-supplementary-material-14.pdf]

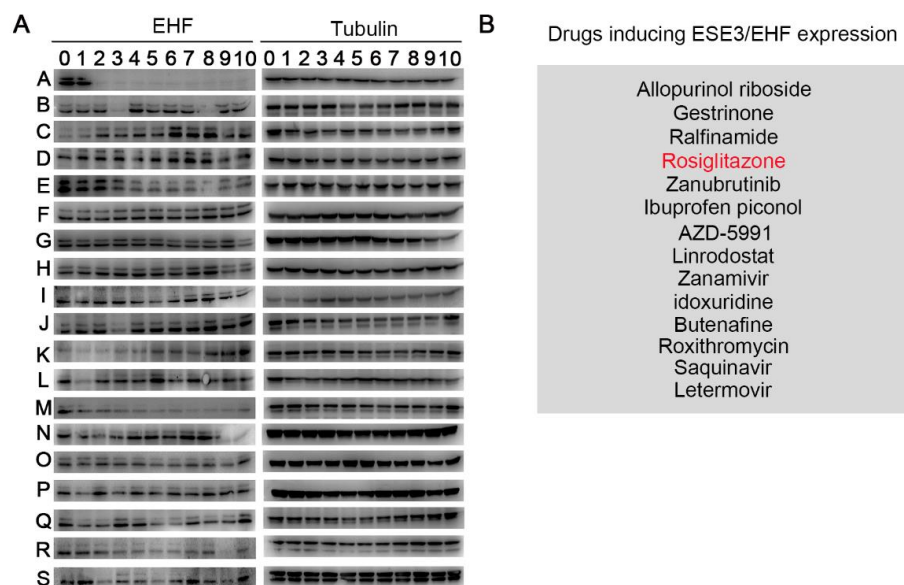

**Supplementary figure 13.** (A) PANC-1 cells were treated with total 190 compounds (10 $\mu$  M; 24h) from our drug library for screening potential ESE3/EHF agonists. A0, B0, C0, D0, E0, F0, G0, H0, I0, J0, K0, L0, M0, N0, O0, P0, Q0, R0 and S0 mean groups treated with DMSO. Western blot was taken to detect EHF protein expression.  $\beta$ -tubulin was used as a loading control for western blot. Experiments were repeated three times independently. Representative results were shown. (B) The list of drugs which induced ESE3/EHF protein expression in PANC-1 cells.
