# Supplementary material
Source: HighWire-hosted journal article supplement (https://gut.bmj.com/content/71/2/357)
Supplement: inline-supplementary-material-15 [file inline-supplementary-material-15.pdf]

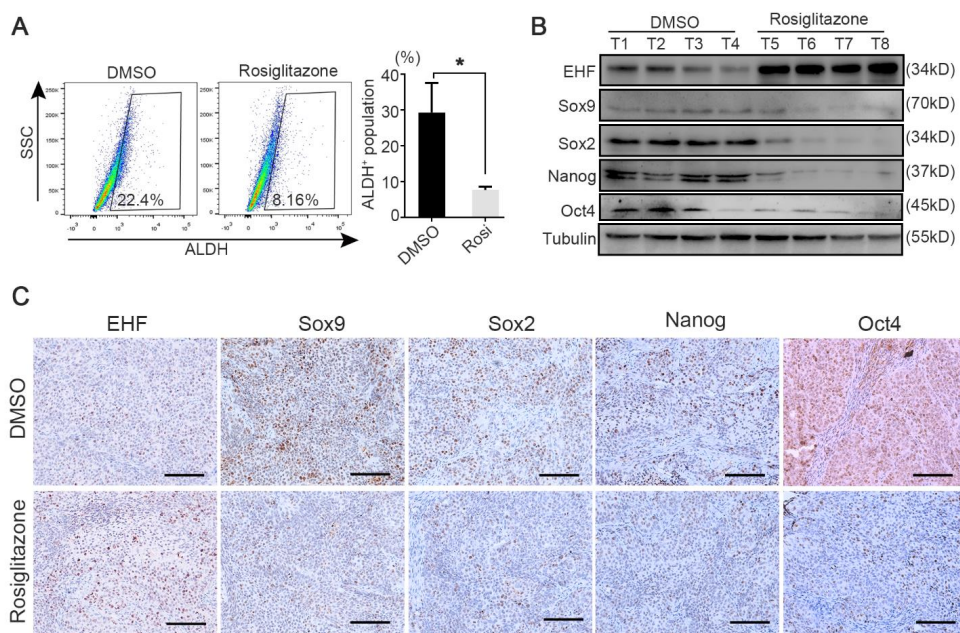

**Supplementary figure 14.** Rosiglitazone suppresses PDAC stemness in orthotopic mouse model. (A) BALB/C nude mice were orthotopically implanted with  $5 \times 10^5$  PANC02 cells. Rosiglitazone was injected intraperitoneally three times a week. Mice were sacrificed at day 28 after drug administration and single cell suspension of pancreatic orthotopic tumors were prepared for ALDH<sup>+</sup> CSCs detection. PI was used to exclude dead cells and CD45 was used to exclude leukocytes and DEAB was used as negative control. Representative dot plots (left) and statistical analysis (right) were shown. (B) Western blot of EHF and stemness markers in tissue proteins from murine pancreatic orthotopic tumors were performed. Tubulin was used as loading control and representative results were shown. (C) IHC of EHF and stemness markers in pancreatic orthotopic tumors were carried out. Bar, 200 μm. All experiments were repeated three times independently. Non-paired Student's t-test was used for statistical analysis. \*P < 0.05.
