# Supplementary material
Source: HighWire-hosted journal article supplement (https://gut.bmj.com/content/71/2/357)
Supplement: inline-supplementary-material-16 [file inline-supplementary-material-16.pdf]

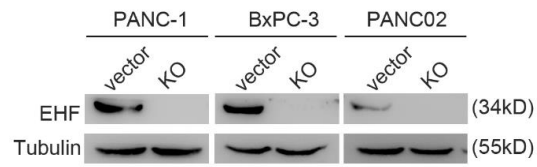

**Supplementary figure 15.** Validation of EHF expression in PANC-1-vector/EHF-KO, BxPC-3-vector/EHF-KO and PANC02-vector/Ehf-KO cell lines by western blot.
