# Supplementary material
Source: HighWire-hosted journal article supplement (https://gut.bmj.com/content/71/2/357)

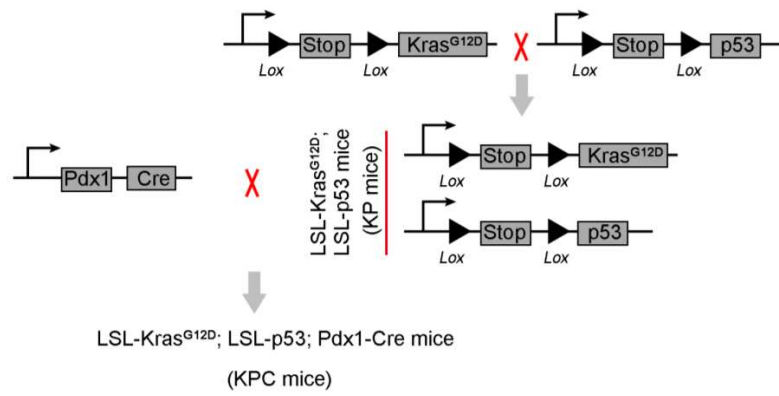

**Supplementary figure 18.** The breeding strategies for KPC mice models.

Supplement: inline-supplementary-material-19 [file inline-supplementary-material-19.pdf]
